# Supplementary material
Source: Research Square preprint supplement (doi:10.21203/rs.3.rs-9074772/v1)
Supplement: Supplementary file 1 [file e36dd8c0640031678cc97233.pdf]

**Supplementary Table S1. Baseline characteristics of all cohorts**

| <b>Baseline characteristics of ICC</b>  |                           |            |            |
|-----------------------------------------|---------------------------|------------|------------|
|                                         |                           | Cohort A   | Cohort B   |
| Patient number                          | /                         | 20         | 20         |
| ROI number                              | /                         | 100        | 100        |
| Age                                     | Range (years)             | 44-79      | 43-82      |
|                                         | Median (years)            | 65.0       | 56.5       |
| Sex                                     | Male                      | 13 (65.0%) | 9 (45.0%)  |
|                                         | Female                    | 7 (35.0%)  | 11 (55.0%) |
| Location                                | Right                     | 9 (45.0%)  | 10 (52.6%) |
|                                         | Left                      | 8 (40.0%)  | 9 (47.4%)  |
|                                         | Both                      | 3 (15.0%)  | 0          |
| Tumor diameter                          | Range (cm)                | 1.2-14     | 0.5-13     |
| Unifocal/Multifocal                     | Unifocal                  | 17 (85.0%) | 18 (90.0%) |
|                                         | Multifocal                | 3 (15.0%)  | 2 (10.0%)  |
| Grading                                 | Moderately differentiated | 12 (60.0%) | 13 (65.0%) |
|                                         | Low grade                 | 8 (40.0%)  | 7 (35.0%)  |
| pT                                      | 1a                        | 4 (20.0%)  | 5 (25.0%)  |
|                                         | 1b                        | 2 (10.0%)  | 2 (10.0%)  |
|                                         | 2                         | 9 (45.0%)  | 8 (40.0%)  |
|                                         | 3                         | 3 (15.0%)  | 3 (15.0%)  |
|                                         | 4                         | 2 (10.0%)  | 2 (10.0%)  |
|                                         | x                         | 8 (40.0%)  | 13 (65.0%) |
| pN                                      | 0                         | 8 (40.0%)  | 5 (25.0%)  |
|                                         | 1                         | 4 (20.0%)  | 2 (10.0%)  |
| HBV infection                           | Positive                  | 5 (25.0%)  | 6 (30.0%)  |
|                                         | Negative                  | 15 (75.0%) | 14 (70.0%) |
| <b>Baseline characteristics of CRLM</b> |                           |            |            |
|                                         |                           | Cohort A   | Cohort B   |
| Patient number                          | /                         | 20         | 20         |
| ROI number                              | /                         | 100        | 100        |
| Age                                     | Range (years)             | 25-74      | 49-80      |
|                                         | Median (years)            | 58         | 62         |
| Sex                                     | Male                      | 9 (45.0%)  | 11 (55.0%) |
|                                         | Female                    | 11 (55.0%) | 9 (45.0%)  |
| Location                                | Right                     | 15 (75.0%) | 15 (75.0%) |
|                                         | Left                      | 3 (15.0%)  | 5 (25.0%)  |
|                                         | Both                      | 2 (10.0%)  | 0          |
| Tumor diameter                          | Range (cm)                | 0.2-5.5    | 0.6-10     |
| Unifocal/Multifocal                     | Unifocal                  | 10 (50.0%) | 13 (65.0%) |
|                                         | Multifocal                | 10 (50.0%) | 7 (35.0%)  |

|         |                           |            |            |
|---------|---------------------------|------------|------------|
| Grading | Moderately differentiated | 14 (70.0%) | 14 (70.0%) |
|         | Low grade                 | 6 (30.0%)  | 6 (30.0%)  |

ICC:intrahepatic cholangiocarcinoma; CRLM:colorectal cancer liver metastases

**Supplementary Table S2.** The polarization basis parameters (PBP)

|                   |                                                        |
|-------------------|--------------------------------------------------------|
| $B_b$             | $(M_{22} + M_{33})/2$                                  |
| $B_\beta$         | $(M_{23} - M_{32})/2$                                  |
| $B_{\bar{b}}$     | $(M_{22} - M_{33})/2$                                  |
| $B_{\bar{\beta}}$ | $(M_{23} + M_{32})/2$                                  |
| $t_1$             | $\sqrt{B_{\bar{b}}^2 + B_{\bar{\beta}}^2}/2$           |
| det B             | $M_{22}M_{33} - M_{23}M_{32}$                          |
| norm B            | $\sqrt{M_{22}^2 + M_{33}^2 + M_{23}^2 + M_{32}^2}$     |
| CD                | $M_{14} + M_{41}$                                      |
| $P_L$             | $\sqrt{M_{21}^2 + M_{31}^2}$                           |
| $D_L$             | $\sqrt{M_{12}^2 + M_{13}^2}$                           |
| $r_L$             | $\sqrt{M_{24}^2 + M_{34}^2}$                           |
| $q_L$             | $\sqrt{M_{42}^2 + M_{43}^2}$                           |
| Transpose asym DP | $\sqrt{(M_{12}^2 - M_{21}^2) + (M_{13}^2 - M_{31}^2)}$ |
| Transpose asym rq | $\sqrt{(M_{24}^2 - M_{42}^2) + (M_{34}^2 - M_{43}^2)}$ |

|                         |                                                      |
|-------------------------|------------------------------------------------------|
| det MM                  | Matrix determinant of Mueller matrix                 |
| norm MM                 | Matrix norm of Mueller matrix                        |
| Trace MM                | Trace of Mueller matrix                              |
| $ \vec{P} $             | $\sqrt{M_{21}^2 + M_{31}^2 + M_{41}^2}$              |
| $ \vec{D} $             | $\sqrt{M_{12}^2 + M_{13}^2 + M_{14}^2}$              |
| $\vec{P} \cdot \vec{D}$ | $M_{12}M_{21} + M_{13}M_{31} + M_{14}M_{41}$         |
| $\vec{P} m \vec{D}$     | Invariant under rotation and retarder transformation |
| $\vec{P} m^T \vec{D}$   | Invariant under rotation and retarder transformation |
| $\lambda_1$             | Eigenvalues of coherence matrix                      |
| $\lambda_2$             | Eigenvalues of coherence matrix                      |
| $\lambda_3$             | Eigenvalues of coherence matrix                      |
| $\lambda_4$             | Eigenvalues of coherence matrix                      |
| $P_1$                   | Indices of polarimetric purity                       |
| $P_2$                   | Indices of polarimetric purity                       |
| $P_3$                   | Indices of polarimetric purity                       |
| $PI$                    | Overall purity index                                 |
| $PD$                    | Depolarization index                                 |
| $S$                     | Polarization entropy                                 |
| $E_S$                   | $M_{11} - M_{22} - M_{33} - M_{44}$                  |

|          |                                                                                             |
|----------|---------------------------------------------------------------------------------------------|
| $E_1$    | $(M_{11} + M_{22})^2 - (M_{12} + M_{22})^2$ $- (M_{33} + M_{44})^2$ $- (M_{34} + M_{43})^2$ |
| $E_2$    | $(M_{11} - M_{22})^2 - (M_{12} - M_{21})^2$ $- (M_{33} - M_{44})^2$ $- (M_{34} + M_{43})^2$ |
| $E_3$    | $(M_{11} + M_{21})^2 - (M_{12} + M_{22})^2$ $- (M_{13} + M_{23})^2$ $- (M_{14} + M_{24})^2$ |
| $E_4$    | $(M_{11} - M_{21})^2 - (M_{12} - M_{22})^2$ $- (M_{13} - M_{23})^2$ $- (M_{14} - M_{24})^2$ |
| $E_5$    | $(M_{11} + M_{12})^2 - (M_{21} + M_{22})^2$ $- (M_{31} + M_{32})^2$ $- (M_{41} + M_{42})^2$ |
| $E_6$    | $(M_{11} - M_{12})^2 - (M_{21} - M_{22})^2$ $- (M_{31} - M_{32})^2$ $- (M_{41} - M_{42})^2$ |
| $D$      | Diattenuation                                                                               |
| $\Delta$ | Total depolarization                                                                        |
| $\delta$ | Linear depolarization                                                                       |

|          |                    |
|----------|--------------------|
| $R$      | Retardence         |
| $\alpha$ | Circular dichroism |
